# Supplementary material
Source: PubMed Central journal article supplement (PMC8108006)
Supplement: NIHMS1692556-supplement-Appendix.pdf [file NIHMS1692556-supplement-Appendix.pdf]

## Appendix 1. Matched Case-Control Analysis of Stillbirths After Maternal Vaccination in the Prepregnancy\* period

| Peri-conception exposure                                       | Vaccination rate<br>in stillbirths<br>(N = 795) | Vaccination rate<br>in live births<br>(N = 3180) | Crude Odds<br>Ratio (95% CI) | Adjusted <sup>†</sup> Odds<br>Ratio (95% CI) | P value |
|----------------------------------------------------------------|-------------------------------------------------|--------------------------------------------------|------------------------------|----------------------------------------------|---------|
| <b>Any vaccination</b>                                         | 69 (8.7%)                                       | 329 (10.4%)                                      | 0.82 (0.62-1.08)             | 0.85 (0.64-1.13)                             | 0.26    |
| <b>Influenza vaccination<sup>‡</sup></b>                       | 41 (5.2%)                                       | 213 (6.7%)                                       | 0.74 (0.52-1.06)             | 0.77 (0.53-1.11)                             | 0.17    |
| <b>Tdap vaccination<sup>§</sup></b>                            | 21 (2.6%)                                       | 90 (2.8%)                                        | 0.93 (0.57-1.51)             | 0.98 (0.59-1.61)                             | 0.93    |
| <b>Non-routinely recommended<br/>vaccinations<sup>  </sup></b> | 20 (2.5%)                                       | 64 (2.0%)                                        | 1.26 (0.76-2.10)             | 1.30 (0.77-2.20)                             | 0.32    |
| <b>Contraindicated vaccinations<sup>¶</sup></b>                | 2 (0.3%)                                        | 15 (0.5%)                                        | 0.53 (0.12-2.33)             | 0.48 (0.11-2.17)                             | 0.34    |

Abbreviations: CI – confidence interval, Tdap – Tetanus, diphtheria, acellular pertussis

\*120 days prior to pregnancy start – 30 days prior to pregnancy start

<sup>†</sup>adjusted for maternal age, smoking during pregnancy, obesity, nulliparity, history of stillbirth, Black non-Hispanic race, maternal comorbidities, pregnancy complications prior to vaccination or index date

<sup>‡</sup>Inactivated influenza vaccination with or without Tdap vaccine

<sup>§</sup>Tdap vaccine with or without inactivated influenza vaccination

<sup>||</sup>Human papillomavirus, meningococcal, pneumococcal, inactivated polio, Japanese encephalitis, rabies, inactivated typhoid, yellow fever, hepatitis A, hepatitis B

<sup>¶</sup>Live attenuated influenza vaccination, measles, mumps, rubella, varicella, zoster

Panagiotakopoulos L, McCarthy NL, Tepper NK, Kharbanda EO, Lipkind HS, Vazquez-Benitez G, et al. Evaluating the association of stillbirths after maternal vaccination in the Vaccine Safety Datalink. *Obstet Gynecol* 2020;136.

The authors provided this information as a supplement to their article.

©2020 American College of Obstetricians and Gynecologists.

**Appendix 2. Post-hoc Analysis: Selected Demographic Characteristics of Women With Pregnancies Ending in Stillbirths (N = 795) and Matched Live Births (N = 3,180)**

| <b>Characteristic</b>                                                     | <b>Stillbirths, N (%)</b> | <b>Livebirths, N (%)</b> | <b>P value*</b> |
|---------------------------------------------------------------------------|---------------------------|--------------------------|-----------------|
| <b>Age at delivery in years (mean, range)</b>                             | 30.6 (14 - 49)            | 31.0 (15-47)             | 0.98            |
| <b>Maternal age ≥ 35 years</b>                                            | 218 (27.4)                | 930 (27.4)               | 1.00            |
| <b>Gestational age at prenatal care initiation in weeks (mean, range)</b> | 7.5 (5-30)                | 7.4 (5-37)               | 0.43            |
| <b>Maternal comorbidity<sup>†</sup></b>                                   | 108 (13.6)                | 132 (4.2)                | <0.001          |
| <b>Pregnancy complication<sup>‡</sup></b>                                 | 365 (45.9)                | 227 (7.1)                | <0.001          |
| <b>Gestational age at first vaccination in weeks (mean, range)</b>        | 17.6 (2 - 39)             | 17.3 (2 - 38)            | 0.69            |
| <b>Tobacco smoking during pregnancy</b>                                   | 57 (7.2)                  | 260 (8.2)                | 0.005           |
| <b>Nulliparous</b>                                                        | 238 (29.9)                | 930 (29.3)               | 0.70            |
| <b>History of stillbirths</b>                                             | 40 (5.0)                  | 58 (1.8)                 | <0.001          |
| <b>Black non-Hispanic</b>                                                 | 107 (13.5)                | 408 (12.8)               | 0.63            |
| <b>Obesity</b>                                                            | 279 (35.1)                | 652 (20.5)               | <0.001          |

\*p-values calculated by chi-squared tests for categorical variables and Wilcoxon median 2-sample test for continuous models

<sup>†</sup>ICD-9 codes for maternal diabetes, systemic lupus erythematosus, thyroid disorders, hypertension, cardiovascular disease cholestasis, renal disease, and sickle cell disease in the 6 months prior to pregnancy through vaccination date or index date (stillbirth outcome date or reference date for matched control)

<sup>‡</sup>ICD-9 codes for maternal infections, placental complications, amniotic cavity or membrane problems, fetal growth restriction, maternal trauma and uterine rupture during current pregnancy and prior to vaccination date or index date

Panagiotakopoulos L, McCarthy NL, Tepper NK, Kharbanda EO, Lipkind HS, Vazquez-Benitez G, et al. Evaluating the association of stillbirths after maternal vaccination in the Vaccine Safety Datalink. *Obstet Gynecol* 2020;136.

The authors provided this information as a supplement to their article.

©2020 American College of Obstetricians and Gynecologists.

### Appendix 3. Post-hoc Analysis: Matched Case-Control Analysis of Stillbirths After Maternal Vaccination During Pregnancy\*

| Exposure during pregnancy                                      | Vaccination rate<br>in stillbirths<br>(N = 795) | Vaccination rate<br>in live births<br>(N = 3180) | Crude Odds<br>Ratio (95% CI) | Adjusted <sup>†</sup> Odds<br>Ratio (95% CI) | P value |
|----------------------------------------------------------------|-------------------------------------------------|--------------------------------------------------|------------------------------|----------------------------------------------|---------|
| <b>Any vaccination</b>                                         | 411 (51.7%)                                     | 1670 (52.5%)                                     | 0.96 (0.80-1.15)             | 0.97 (0.80-1.17)                             | 0.71    |
| <b>Influenza vaccination<sup>‡</sup></b>                       | 343 (43.1%)                                     | 1396 (43.9%)                                     | 0.96 (0.80-1.15)             | 0.98 (0.81-1.17)                             | 0.79    |
| <b>Tdap vaccination<sup>§</sup></b>                            | 184 (23.1%)                                     | 734 (23.1%)                                      | 1.01 (0.78-1.30)             | 0.99 (0.77-1.29)                             | 0.96    |
| <b>Non-routinely recommended<br/>vaccinations<sup>  </sup></b> | 9 (1.1%)                                        | 30 (0.9%)                                        | 1.21 (0.57-2.59)             | 1.36 (0.62-2.96)                             | 0.44    |
| <b>Contraindicated vaccinations<sup>¶</sup></b>                | 0                                               | 2 (0.1%)                                         | -                            | -                                            | -       |

Abbreviations: CI – confidence interval, Tdap – Tetanus, diphtheria, acellular pertussis

\*14 days after the last menstrual period through seven days prior to the index date (stillbirth outcome date or reference date for matched control)

<sup>†</sup>Adjusted for maternal age, smoking during pregnancy, obesity, nulliparity, history of stillbirth, Black non-Hispanic race, and maternal comorbidities and pregnancy complications occurring prior to vaccination

<sup>‡</sup>Inactivated influenza vaccination with or without Tdap vaccination

<sup>§</sup>Tdap vaccination with or without inactivated influenza vaccination

<sup>||</sup>Human papillomavirus, meningococcal, pneumococcal, inactivated polio, Japanese encephalitis, rabies, inactivated typhoid, yellow fever, hepatitis A, hepatitis B

<sup>¶</sup>Live attenuated influenza vaccination, measles, mumps, rubella, varicella, zoster

Panagiotakopoulos L, McCarthy NL, Tepper NK, Kharbanda EO, Lipkind HS, Vazquez-Benitez G, et al. Evaluating the association of stillbirths after maternal vaccination in the Vaccine Safety Datalink. *Obstet Gynecol* 2020;136.

The authors provided this information as a supplement to their article.

©2020 American College of Obstetricians and Gynecologists.

**Appendix 4. Stillbirth rate by year in the Vaccine Safety Datalink in pregnancies ending between January 1, 2007, and December 31, 2015**

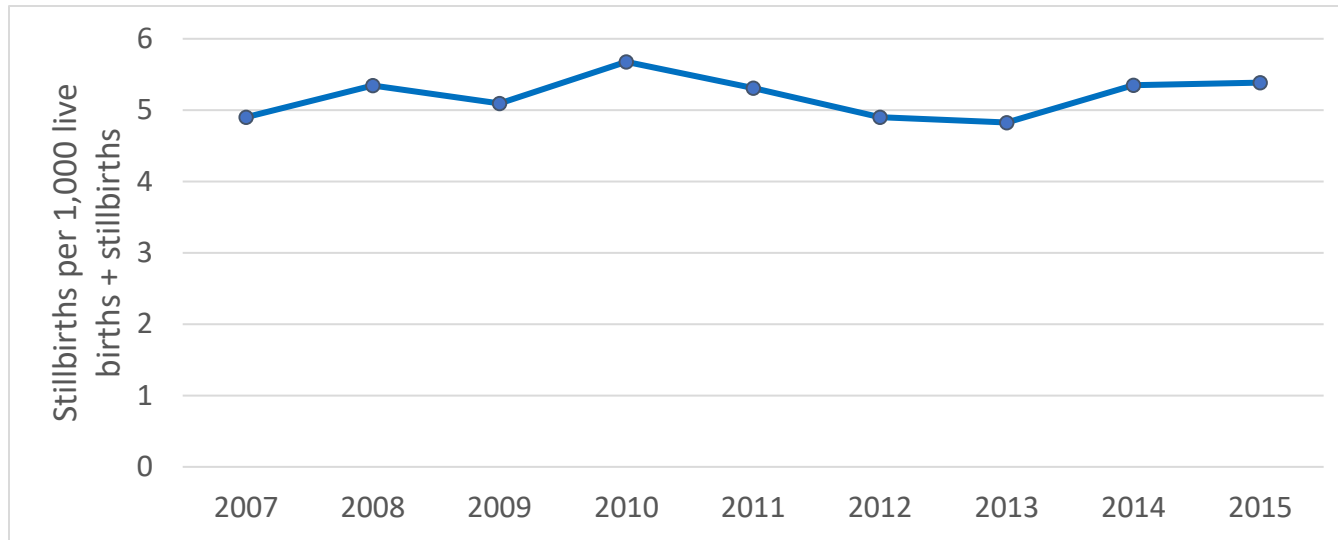

Panagiotakopoulos L, McCarthy NL, Tepper NK, Kharbanda EO, Lipkind HS, Vazquez-Benitez G, et al. Evaluating the association of stillbirths after maternal vaccination in the Vaccine Safety Datalink. *Obstet Gynecol* 2020;136.

The authors provided this information as a supplement to their article.

©2020 American College of Obstetricians and Gynecologists.
